# Supplementary material for: Selective IAP inhibition results in sensitization of unstimulated but not CD40-stimulated chronic lymphocytic leukaemia cells to TRAIL-induced apoptosis
Source: PubMed Central journal article supplement — Pharmacol Res Perspect. 2014 Sep 1;2(6):e00081. doi: 10.1002/prp2.81 (PMC4186455; doi:10.1002/prp2.81), 2014-09-01
Supplement: prp20002-e00081-SD1.pdf [file prp20002-e00081-SD1.pdf]

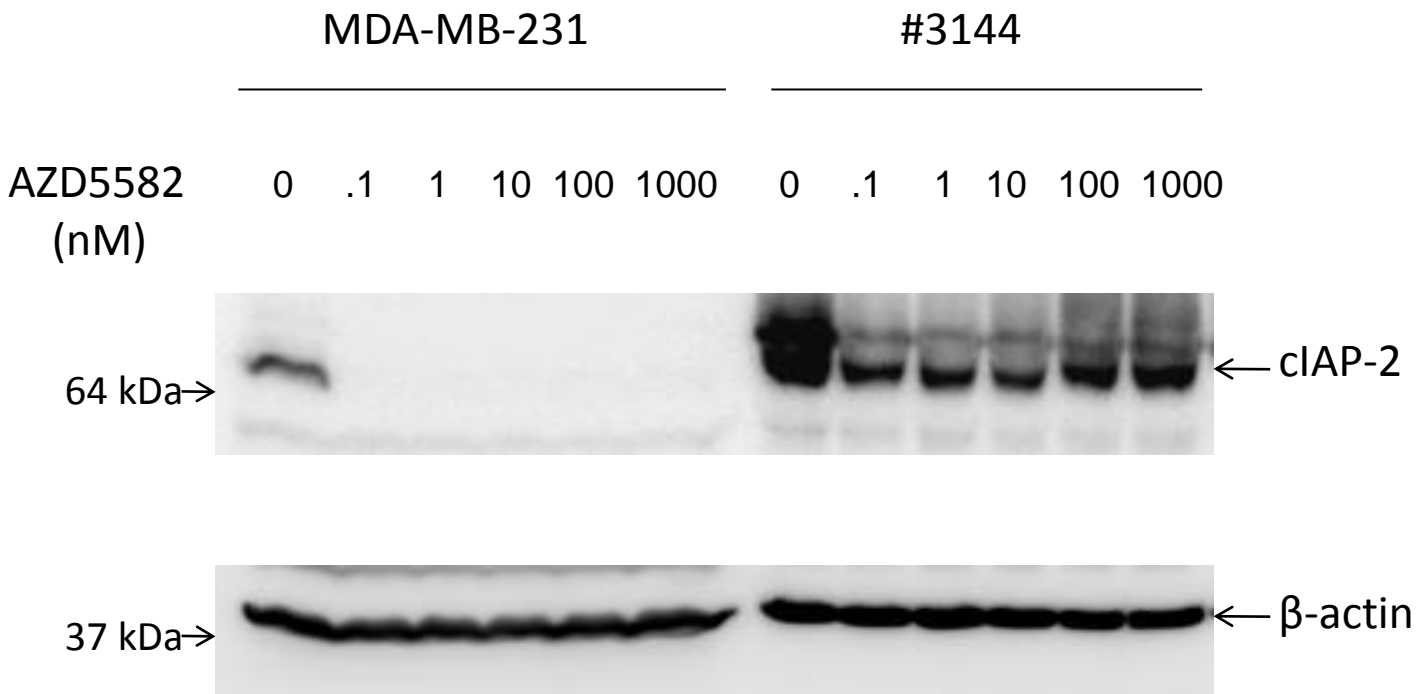

**Supplementary Figure S1. AZD5582 is potent in inducing degradation of IAP proteins.** Primary CLL cells (#3144) were incubated for 4h with AZD5582 at the indicated concentrations and then examined for expression of cIAP-2 by Western blotting.  $\beta$ -actin was used as control for protein loading. The human breast cancer cell line MDA-MB-231 was used as a positive control as it has been shown that IAPs were extensively degraded by SMAC mimetic IAP inhibitor AZD5582 (Hennessey et al., J Med Chem, 2013).

## Pearson's correlation analysis

 $R^2=0.001, P=0.99$ 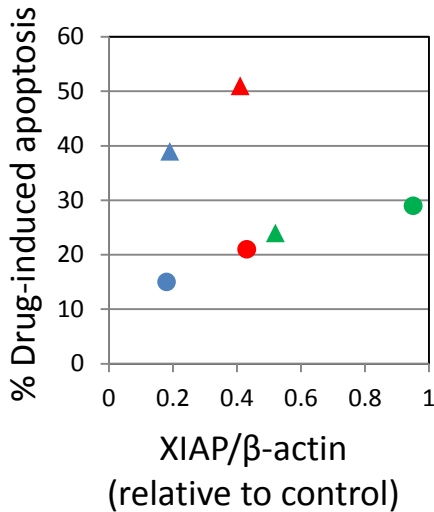 $R^2= 0.06, P=0.881$ 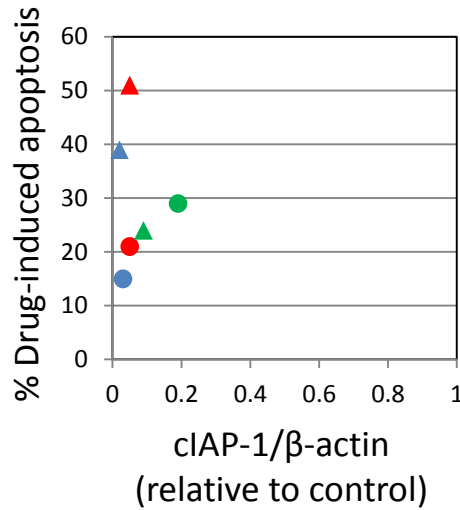 $R^2=0.014, P=0.826$ 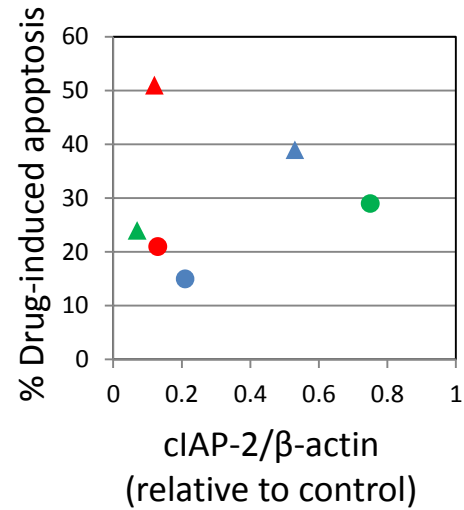

● #2096 (17p-)

● #2263 (11q-)

● #2441 (no 17p-/11q-)

▲ #2103 (17p-)

▲ #2474 (11q-)

▲ #2968 (no 17p-/11q-)

**Supplementary Figure S2. Lack of correlation between levels of individual IAPs after AZD5582 treatment and sensitivity to TRAIL-induced apoptosis.** Primary CLL cells were co-incubated for 48h with 1 nM AZD5582 and recombinant human TRAIL (500 ng/ml) and cell death measured by flow cytometry. Pearson's correlation analysis was performed to determine the statistical significance of the correlation between the AZD5582-induced reduction in levels of XIAP, cIAP-1 and cIAP-2 and sensitivity to TRAIL-induced killing among the six cases examined.

a

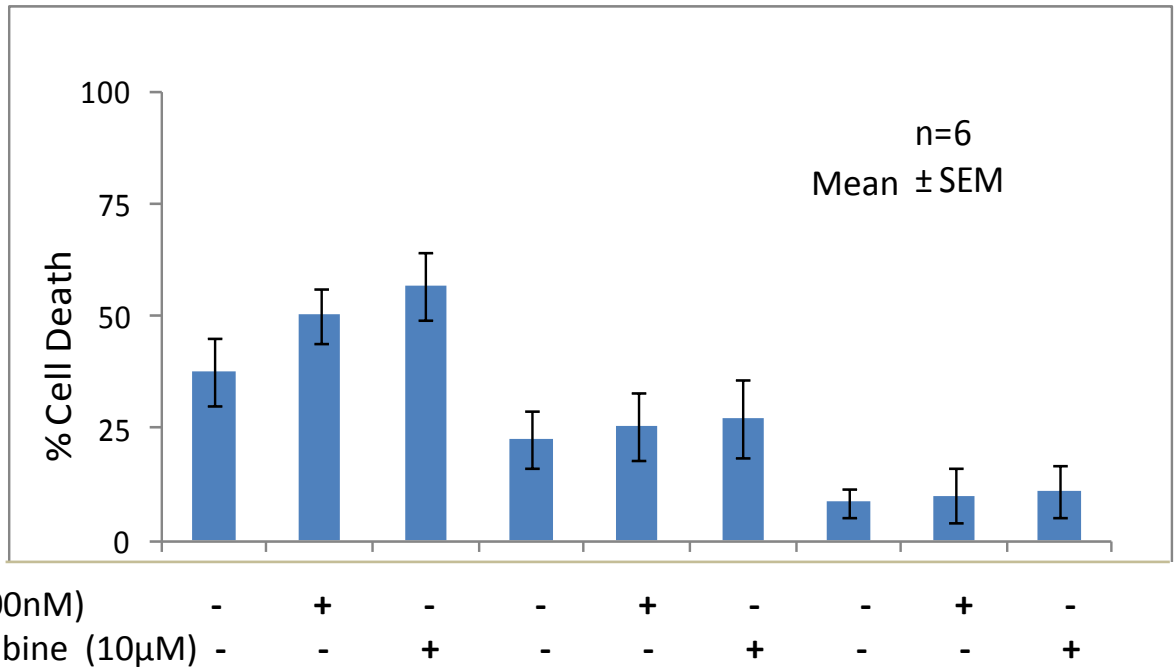

b

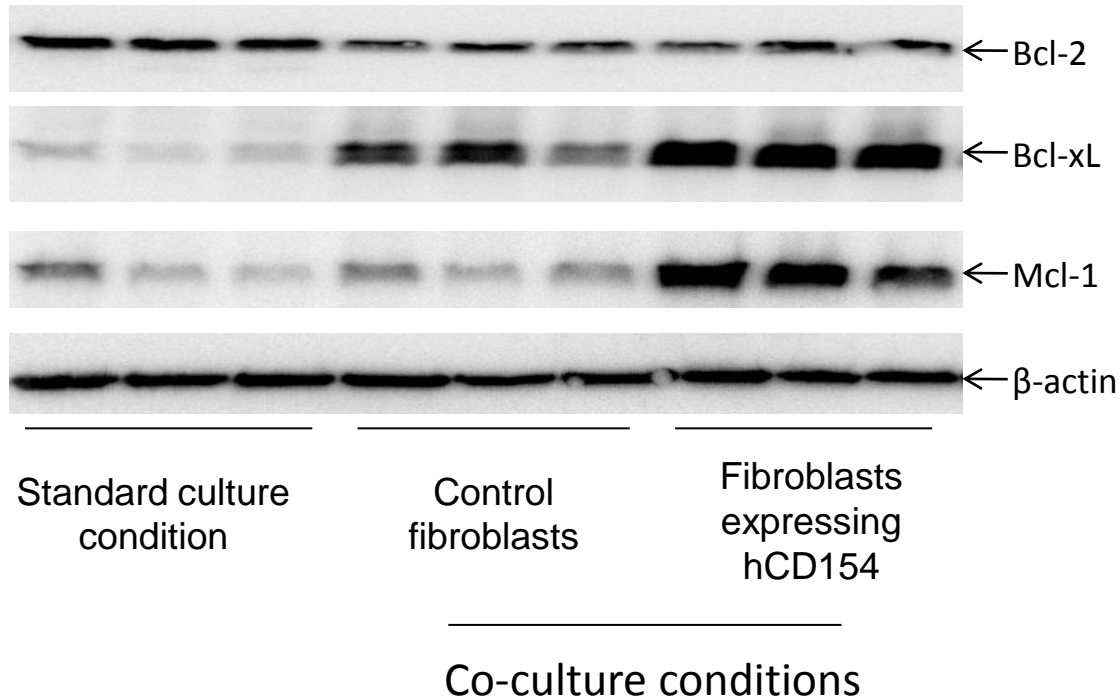

**Supplementary Figure S3. CD40 stimulation protects CLL cells from spontaneous apoptosis and killing induced by fludarabine and dexamethasone.** (a) CLL cells were cultured for 48 h under standard conditions or on parental or CD154-expressing fibroblasts in the absence or presence of fludarabine (10 $\mu$ M) or dexamethasone (Dex) (100nM). CLL cells were then harvested for analysis of viability by flow cytometry. (b) CLL cells cultured for 48 h under the same conditions as in (a) were also examined for the expression of Bcl-xL, Mcl-1 and Bcl-2 proteins by Western blotting
